# Supplementary material for: A Monovalent and Trivalent MVA-Based Vaccine Completely Protects Mice Against Lethal Venezuelan, Western, and Eastern Equine Encephalitis Virus Aerosol Challenge
Source: PubMed Central journal article supplement (PMC7851092; doi:10.3389/fimmu.2020.598847), 2021-01-19

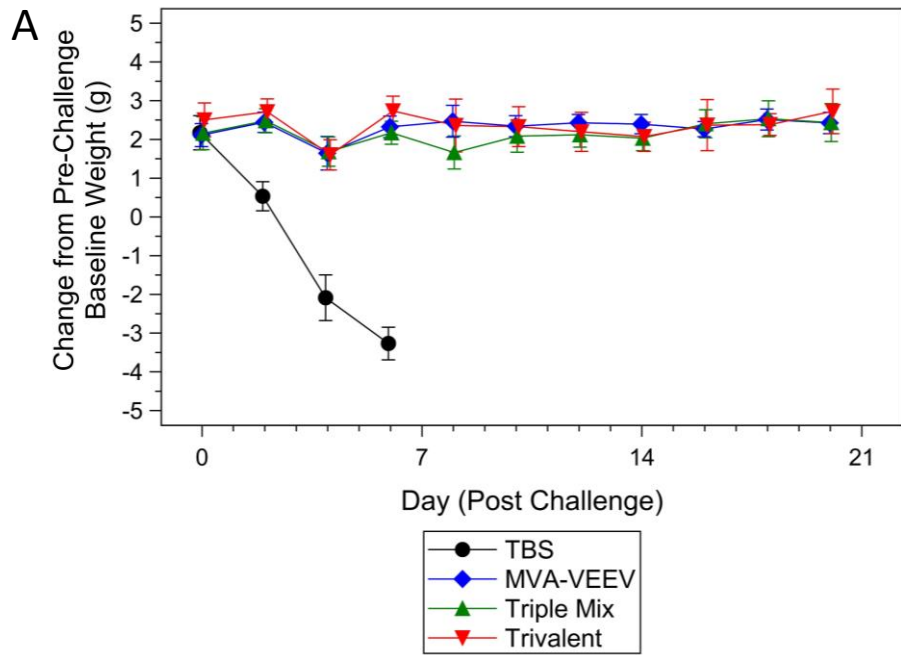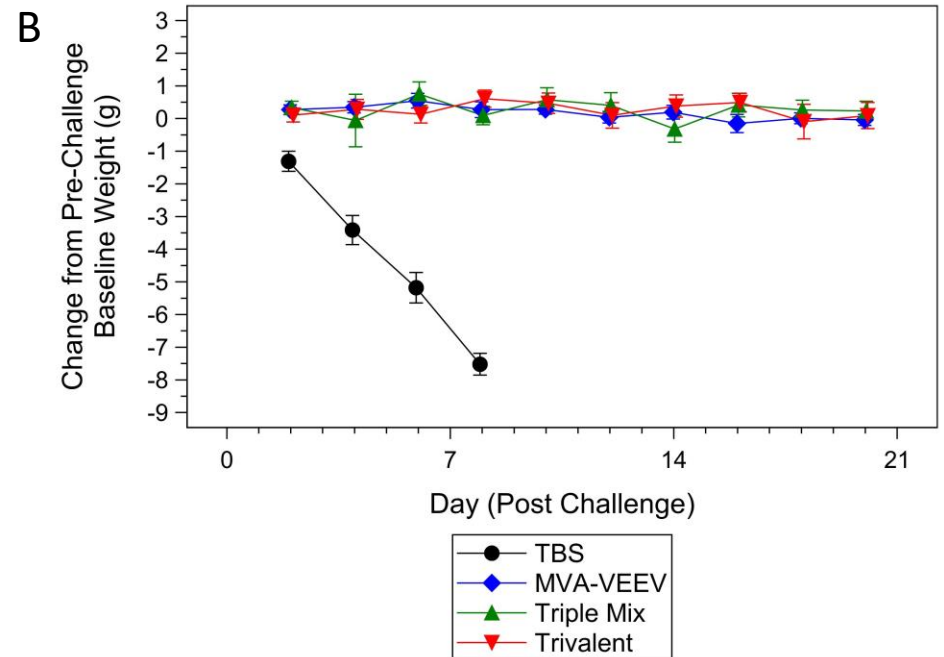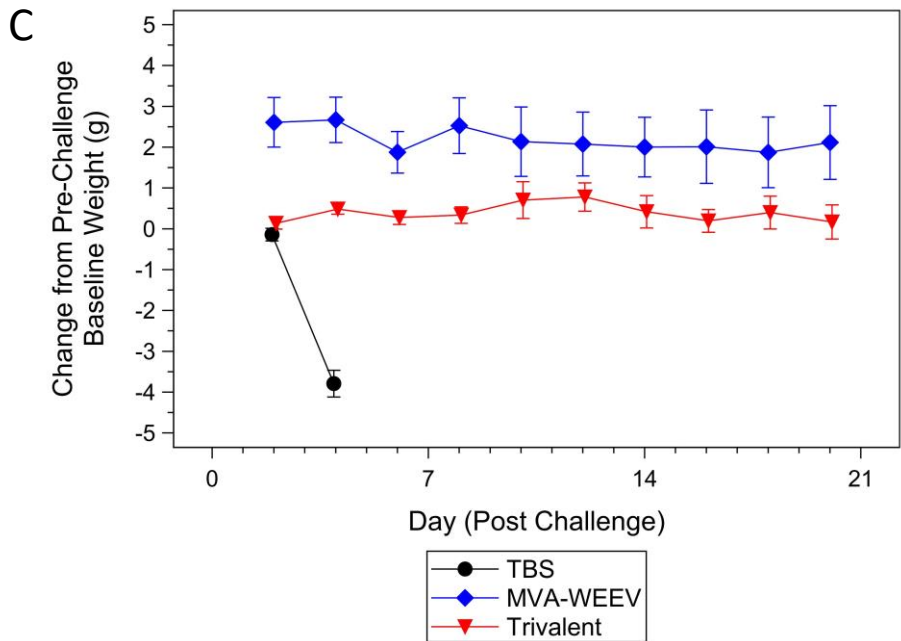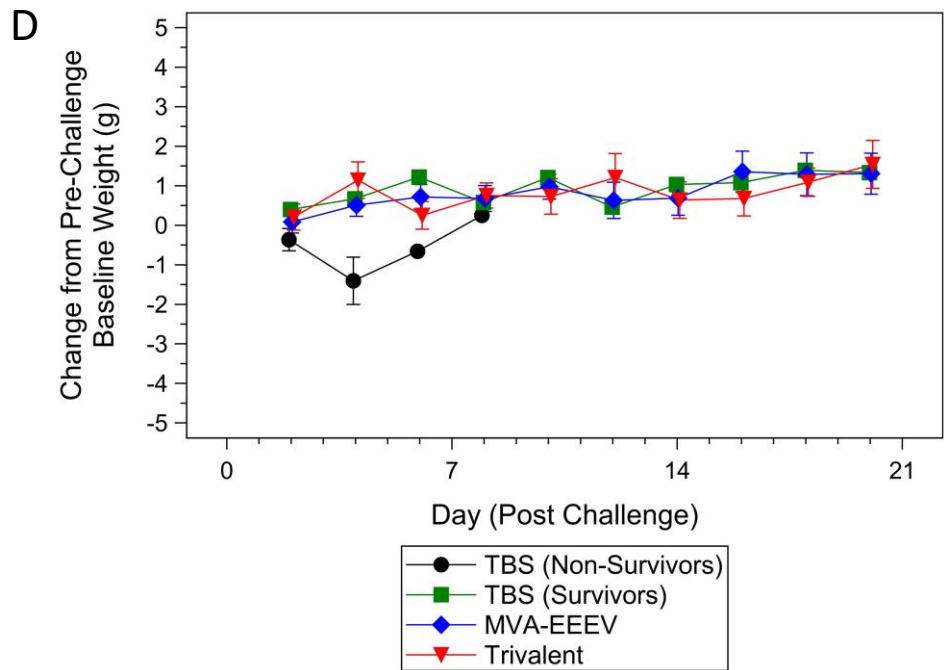

Supplement: Image_1.pdf [file Image_1.pdf]
